# Supplementary material
Source: PubMed Central journal article supplement (PMC5689129)
Supplement: Supp_Table3.pdf [file Supp_Table3.pdf]

SUPPLEMENTARY TABLE S3. SEX-RELATED DIFFERENCES IN THE PORCINE MODEL  
FOR CARTILAGE AND THE ANTERIOR CRUCIATE LIGAMENT

| <i>Tissue property</i>                                              | <i>Value</i> | <i>Sex</i> | <i>Age group</i> | <i>n</i>              | <i>Breed</i>      | <i>Reference</i>                          |
|---------------------------------------------------------------------|--------------|------------|------------------|-----------------------|-------------------|-------------------------------------------|
| Cartilage                                                           | 0.563        | Male       | 11–55 months     | 62                    | Gottingen minipig | Gotterbarm<br><i>et al.</i> <sup>56</sup> |
| Thickness (mm)                                                      | 0.475        | Female     | 11–55 months     | 28                    | Gottingen minipig |                                           |
| Anterior cruciate ligament,<br>reconstructed                        |              |            |                  |                       |                   |                                           |
| % difference in normalized yield<br>load of female compared to male | -18.5±7.7    | —          | 15±1 months      | 23 male,<br>18 female | Yucatan minipig   | Kiapour<br><i>et al.</i> <sup>58</sup>    |
| % difference in normalized stiffness<br>of female compared to male  | -11.9±5.6    |            |                  |                       |                   |                                           |

A dash indicates the parameter was not applicable or unspecified.
